# Supplementary material for: Genetic Screening of Targeted Region on the Chromosome 22q11.2 in Patients with Microtia and Congenital Heart Defect
Source: MDPI journal article supplement (doi:10.3390/genes14040879), 2023-04-07
Supplement: s1 [file s1]

## Supplementary Material

**Table S1 Primers and probes used for duplex qRT-PCR**

| CNV  | Primer/probe | Sequence of primers and fluorescence labeling probes |
|------|--------------|------------------------------------------------------|
| DUP1 | Forward      | 5'-ATCTCCTGTCAGCTCTGCGATT-3'                         |
|      | Reverse      | 5'-AAGGAACGCATCCAACCACTAC-3'                         |
|      | Probe        | 5'-FAM-TTGCACCTACCATAGTC-MGB-3'                      |
| DUP2 | Forward      | 5'-AGAGGCTCACACTAGCAACAAAGAT-3'                      |
|      | Reverse      | 5'-CAAGGCACCGTCCTGAATTATACT-3'                       |
|      | Probe        | 5'-FAM-CACCACCCTTTGGAAG-MGB-3'                       |
| DUP3 | Forward      | 5'-ACATCCGGCTCATCGCC-3'                              |
|      | Reverse      | 5'-GTTGCCCCGTTAGCACATTC-3'                           |
|      | Probe        | 5'-FAM-CCAAAGGTCCTGTGGCT-MGB-3'                      |
| DUP4 | Forward      | 5'-CACTCCACCATCCACTCCG-3'                            |
|      | Reverse      | 5'-TCTGAACTTTCAGGACTTGTTAGTGC-3'                     |
|      | Probe        | 5'-FAM-CCTTTAAACCAGGAGTGC-MGB-3'                     |
| DEL1 | Forward      | 5'-GGCAAACCTTGAGCGTCTCTACA-3'                        |
|      | Reverse      | 5'-GGCAACATTCAACCCATTACATAG-3'                       |
|      | Probe        | 5'-FAM-ACACGTTCAACCCTCC-MGB-3'                       |
| DEL2 | Forward      | 5'-AGAAAGGAACCAAAGATCAAAAGG-3'                       |
|      | Reverse      | 5'-CCACCTAAGACAAAGAGGATTTCG-3'                       |
|      | Probe        | 5'-FAM-CTTTCCAAGGCTTGGAC-MGB-3'                      |

**Table S2 Summary of targeted-sequencing data output**

| <b>Patient</b> | <b>Raw Reads</b> | <b>Raw Base(G)</b> | <b>Clean Reads</b> | <b>Depth</b> | <b>Coverage</b> |
|----------------|------------------|--------------------|--------------------|--------------|-----------------|
| 1              | 35883834         | 5.38               | 30802516           | 80.07        | 97.35%          |
| 2              | 32781824         | 4.92               | 28822130           | 85.38        | 97.73%          |
| 3              | 33622166         | 5.04               | 27994164           | 81.96        | 97.72%          |
| 4              | 34491878         | 5.17               | 28244946           | 80.08        | 98.35%          |
| 5              | 32460566         | 4.87               | 28562040           | 86.14        | 98.36%          |
| 6              | 34199606         | 5.13               | 31184198           | 91.31        | 97.74%          |
| 7              | 37378204         | 5.61               | 29755168           | 78.28        | 97.50%          |
| 8              | 35575630         | 5.34               | 29188210           | 81.27        | 98.35%          |
| 9              | 37089256         | 5.56               | 30159764           | 81.53        | 97.30%          |
| 10             | 33052802         | 4.96               | 27455932           | 73.65        | 98.19%          |
| 11             | 31102748         | 4.67               | 26788286           | 74.16        | 98.13%          |
| 12             | 37539910         | 5.63               | 33862986           | 94.74        | 98.07%          |
| 13             | 30253142         | 4.54               | 26569718           | 81.09        | 97.59%          |
| 14             | 33468350         | 5.02               | 27441592           | 76.49        | 98.28%          |
| 15             | 38933386         | 5.84               | 31109562           | 88.67        | 98.16%          |
| 16             | 26463634         | 3.97               | 23091548           | 66.41        | 97.45%          |
| 17             | 29144618         | 4.37               | 25305342           | 70.42        | 98.17%          |
| 18             | 31806286         | 4.77               | 25894938           | 69.22        | 97.50%          |
| 19             | 34402660         | 5.16               | 29765070           | 88.22        | 98.35%          |
| 20*            | 31444142         | 4.72               | 27788266           | 65.39        | 97.29%          |
| 21             | 33526598         | 5.03               | 29025868           | 80.62        | 97.31%          |
| 22             | 34205170         | 5.13               | 30492640           | 88.04        | 97.46%          |

\* the child in the nuclear family. 21 and 22 are the father and mother in the nuclear family.

**Table S3 The association between SNPs (SNP-2) and genes**

| Gene   | SNPs       | Frequency | Samples       | P       |
|--------|------------|-----------|---------------|---------|
| CXCL10 | rs368014   | 0.1579    | 2,10,12,13,15 | 0.0001  |
|        | rs11704009 | 0.0263    | 9             | 0.00009 |
|        | rs9623076  | 0.0526    | 1,6           | 0.00002 |
|        | rs4820360  | 0.0526    | 1,6           | 0.00005 |
| DGCR2  | rs738802   | 0.1111    | 2,8,14,19     | 0.0001  |
| DGCR11 |            |           |               |         |
| DGCR12 | rs396330   | 0.0526    | 7,15          | 0.00001 |

**Table S4 Distribution of CNVs in samples**

| Sample | Counts | Length<br>(kbp) | DUP   | DUP Length<br>(kbp) | DEL   | DEL Length<br>(kbp) | Counts<br>(unique<br>CNV) |
|--------|--------|-----------------|-------|---------------------|-------|---------------------|---------------------------|
| 1      | 60     | 763.00          | 43    | 703.60              | 17    | 59.40               | 22                        |
| 2      | 60     | 806.70          | 38    | 699.80              | 22    | 106.90              | 34                        |
| 3      | 58     | 733.20          | 37    | 575.70              | 21    | 157.50              | 25                        |
| 4      | 57     | 712.20          | 36    | 583.60              | 21    | 128.60              | 26                        |
| 5      | 55     | 809.40          | 38    | 690.30              | 17    | 119.10              | 27                        |
| 6      | 59     | 921.70          | 38    | 775.60              | 21    | 146.10              | 24                        |
| 7      | 59     | 956.90          | 37    | 798.70              | 22    | 158.20              | 24                        |
| 8      | 11     | 179.70          | 9     | 167.40              | 2     | 12.30               | 5                         |
| 9      | 57     | 828.80          | 35    | 685.30              | 22    | 143.50              | 21                        |
| 10     | 56     | 885.90          | 36    | 765.90              | 20    | 120.00              | 25                        |
| 11     | 51     | 753.80          | 34    | 662.70              | 17    | 91.10               | 22                        |
| 12     | 58     | 904.90          | 42    | 792.30              | 16    | 112.60              | 33                        |
| 13     | 58     | 855.90          | 33    | 707.50              | 25    | 148.40              | 27                        |
| 14     | 52     | 788.40          | 32    | 649.20              | 20    | 139.20              | 19                        |
| 15     | 63     | 894.20          | 42    | 774.70              | 21    | 106.50              | 28                        |
| 16     | 48     | 663.80          | 35    | 539.00              | 13    | 124.80              | 21                        |
| 17     | 50     | 952.60          | 37    | 857.00              | 13    | 95.60               | 25                        |
| 18     | 62     | 854.10          | 38    | 730.00              | 24    | 124.10              | 27                        |
| 19     | 58     | 646.00          | 40    | 545.20              | 18    | 100.80              | 25                        |
| 21     | 50     | 826.30          | 31    | 688.80              | 19    | 137.50              | 23                        |
| 22     | 53     | 797.30          | 39    | 731.00              | 14    | 66.30               | 24                        |
| Total  | 1135   | 16534.80        | 750   | 14123.30            | 385   | 2398.50             | 504                       |
| Mean   | 54.05  | 787.37          | 35.71 | 672.54              | 18.33 | 114.21              | 24.14                     |

**Table S5 Summary of findings**

| Candidate<br>genes | functional<br>annotation | eQTL<br>analysis | gene-based<br>testing | CNV<br>analysis |
|--------------------|--------------------------|------------------|-----------------------|-----------------|
| <i>SUSD2</i>       |                          |                  | √                     | √               |
| <i>TBX1</i>        | √                        |                  | √                     |                 |
| <i>DGCR8</i>       | √                        |                  | √                     |                 |
| <i>CXCL10</i>      |                          | √                |                       |                 |
| <i>CLTCL1</i>      |                          |                  | √                     |                 |
| <i>TANGO2</i>      |                          |                  | √                     |                 |
| <i>RIMBP3</i>      |                          |                  | √                     |                 |
| <i>PI4KA</i>       |                          |                  | √                     |                 |
| <i>UFD1</i>        |                          |                  | √                     |                 |
